# Supplementary material for: Lanthanide complexes assembled from two flexible amide-type tripodal ligands: terminal groups effect on photoluminescence behavior
Source: Royal Society of Chemistry journal article supplement (doi:10.1039/c2dt11761d), 2012-01-01
Supplement: c2dt11761d.pdf [file c2dt11761d.pdf]

## Supporting information

### Lanthanide complexes assembled from two flexible amide-type tripodal ligands: terminal groups effect on photoluminescence

#### behavior

Qin Wang, Kuanzhen Tang, Xiaojie Jin, Xiaoguang Huang, Weisheng Liu, Xiaojun Yao, Yu Tang\*

#### Synthesis of ligands

Preparation of the tripodal ligand L<sup>I</sup>: (bis-carboxymethyl-amino)-acetic acetate (3.44 g, 12.5 mmol) and benzylamine (5.36 g, 50 mmol) were warmed to ca. 120°C for 12 h. The resulted solid was recrystallized with acetone to get tripodal ligand L<sup>I</sup>,<sup>1</sup> yield 65%, m.p.145–146°C. <sup>1</sup>HNMR (CDCl<sub>3</sub>, 300 MHz) δ: 3.37 (s, 6H), 4.34 (d, *J* = 3.6 Hz, 6H), 7.19–7.29 (m, Ar–H, 15H), 7.51 (s, 3H); IR (KBr, cm<sup>-1</sup>) ν: 3289, 1649, 1543, 1453, 1264, 1175, 977, 749, 695; Anal. Calcd. for C<sub>27</sub>H<sub>30</sub>N<sub>4</sub>O<sub>3</sub>: C 70.72, H 6.59, N 12.22; Found C 70.55, H 6.48, N 12.50.

Preparation of the tripodal ligand L<sup>II</sup>: (bis-carboxymethyl-amino)-acetic acetate (3.44 g, 12.5 mmol) and 1-naphthalenemethylamine (7.86 g, 50 mmol) were warmed to ca. 120°C for 12 h. The resulted solid was recrystallized with acetone to get tripodal ligand L<sup>II</sup>, yield 60%, m.p.80–82°C. <sup>1</sup>HNMR (CDCl<sub>3</sub>, 300 MHz) δ: 3.08 (s, 6H), 4.52 (d, *J* = 5.4 Hz, 6H), 7.22–7.81(m, Ar–H, N–H, 24H); IR (KBr, cm<sup>-1</sup>) ν: 3325, 1649, 1541, 1424, 1395, 1290, 1163, 1028, 794; Anal. Calcd. for C<sub>39</sub>H<sub>36</sub>N<sub>4</sub>O<sub>3</sub>: C 76.95, H 5.96, N 9.20; Found C 76.82, H 5.90, N 9.14.

#### Elemental analysis and IR spectra of the complexes and crystals

EuL<sup>I</sup><sub>2</sub>(NO<sub>3</sub>)<sub>3</sub>·2H<sub>2</sub>O Analytical data (%), Calcd: C, 50.23; H, 5.00; N, 11.93; Found: C, 50.55; H, 5.20; N, 12.19. IR (KBr, cm<sup>-1</sup>) ν: 3395, 1632, 1384, 1117, 1042, 834.

TbL<sup>I</sup><sub>2</sub>(NO<sub>3</sub>)<sub>3</sub>·2H<sub>2</sub>O Analytical data (%), Calcd: C, 49.97; H, 4.97; N, 11.87; Found: C, 49.89; H, 4.76; N, 12.20. IR (KBr, cm<sup>-1</sup>) ν: 3424, 1637, 1382, 1319, 1245, 1127, 1027, 901, 825.

GdL<sup>I</sup><sub>2</sub>(NO<sub>3</sub>)<sub>3</sub>·2H<sub>2</sub>O Analytical data (%), Calcd: C, 50.03; H, 4.98; N, 11.88; Found: C, 50.34; H, 4.96; N, 12.02. IR (KBr, cm<sup>-1</sup>) ν: 3425, 1637, 1384, 1319, 1245, 1127, 1027, 827.

[EuL<sup>I</sup><sub>2</sub>(C<sub>3</sub>H<sub>6</sub>O)]·(NO<sub>3</sub>)<sub>3</sub>·(HCCl<sub>3</sub>)·(H<sub>2</sub>O)<sub>4</sub> (**1**) Analytical data (%), Calcd: C, 46.30; H, 5.02; N, 10.24; Found: C, 45.85; H, 5.22; N, 10.46.

EuL<sup>II</sup>(NO<sub>3</sub>)<sub>3</sub>·2H<sub>2</sub>O Analytical data (%), Calcd: C, 47.60; H, 4.10; N, 9.98; Found: C, 47.89; H, 4.18; N, 9.85. IR (KBr, cm<sup>-1</sup>) ν: 3294, 1705, 1658, 1639, 1593, 1480, 1385, 1332, 1294, 1033, 904, 776.

TbL<sup>II</sup>(NO<sub>3</sub>)<sub>3</sub>·2H<sub>2</sub>O Analytical data (%), Calcd: C, 47.33; H, 4.07; N, 9.91; Found: C, 47.79; H, 4.15; N, 9.76. IR (KBr, cm<sup>-1</sup>)  $\nu$ : 3294, 1705, 1658, 1640, 1481, 1385, 1297, 1164, 1128, 1034, 904, 777.

GdL<sup>II</sup>(NO<sub>3</sub>)<sub>3</sub>·2H<sub>2</sub>O Analytical data (%), Calcd: C, 47.41; H, 4.08; N, 9.92; Found: C, 47.56; H, 4.23; N, 9.79. IR (KBr, cm<sup>-1</sup>)  $\nu$ : 3294, 1705, 1657, 1638, 1385, 1297, 1164, 1128, 904, 780.

EuL<sup>II</sup>(NO<sub>3</sub>)<sub>3</sub> (**3**) Analytical data (%), Calcd: C, 49.48; H, 3.83; N, 10.36; Found: C, 49.69; H, 3.65; N, 10.55.

TbL<sup>II</sup>(NO<sub>3</sub>)<sub>3</sub> (**4**) Analytical data (%), Calcd: C, 49.12; H, 3.80; N, 10.28; Found: C, 49.45; H, 3.46; N, 10.78.

We also have conducted additional experiments to prove that 1:2 (M:L<sup>I</sup>) type coordination structure is comparatively stable for L<sup>I</sup>. The solid complex powders are obtained from mixtures under the ratio 1:1 (M:L<sup>I</sup>) in ethyl acetate. The elemental analysis data of precipitated powders show the 1:1 type coordination structure, but the powders appear 1:2 type coordination structure when recrystallized in acetone-trichloromethane (v/v=1:3). It proves that the 1:2 (M:L<sup>I</sup>) type coordination structure is comparatively stable for the complexes of L<sup>I</sup>. And we couldn't obtain the solid complexes under the ratio 1:2 (M:L<sup>II</sup>) in acetone for ligand L<sup>II</sup>.

**Table S1** Selected bond lengths (Å) and angles (°) for the complexes **1**, **3**, and **4**

| 1               |           |                 |            |                 |            |
|-----------------|-----------|-----------------|------------|-----------------|------------|
| Eu(1)—O(1)      | 2.412(6)  | Eu(1)—O(2)      | 2.414(7)   | Eu(1)—O(3)      | 2.403(7)   |
| Eu(1)—O(4)      | 2.429(6)  | Eu(1)—O(5)      | 2.398(7)   | Eu(1)—O(6)      | 2.412(6)   |
| Eu(1)—O(7)      | 2.422(8)  | Eu(1)—N(1)      | 2.693(8)   | Eu(1)—N(5)      | 2.722(7)   |
| O(1)—Eu(1)—O(2) | 127.8(2)  | O(1)—Eu(1)—O(3) | 93.4(2)    | O(2)—Eu(1)—O(3) | 73.8(2)    |
| O(1)—Eu(1)—O(6) | 148.4(2)  | O(2)—Eu(1)—O(6) | 79.6(2)    | O(3)—Eu(1)—O(6) | 78.7(2)    |
| O(1)—Eu(1)—O(5) | 77.4(2)   | O(2)—Eu(1)—O(5) | 135.4(2)   | O(3)—Eu(1)—O(5) | 148.2(2)   |
| O(6)—Eu(1)—O(5) | 93.3(2)   | O(1)—Eu(1)—O(7) | 73.3(2)    | O(2)—Eu(1)—O(7) | 141.1(3)   |
| O(3)—Eu(1)—O(7) | 72.5(3)   | O(6)—Eu(1)—O(7) | 75.2(2)    | O(5)—Eu(1)—O(7) | 75.8(3)    |
| O(1)—Eu(1)—O(4) | 80.2(2)   | O(2)—Eu(1)—O(4) | 75.8(2)    | O(3)—Eu(1)—O(4) | 135.3(2)   |
| O(6)—Eu(1)—O(4) | 126.5(2)  | O(5)—Eu(1)—O(4) | 73.7(2)    | O(7)—Eu(1)—O(4) | 143.1(3)   |
| O(1)—Eu(1)—N(1) | 63.3(2)   | O(2)—Eu(1)—N(1) | 65.3(2)    | O(3)—Eu(1)—N(1) | 66.0(2)    |
| O(6)—Eu(1)—N(1) | 135.4(2)  | O(5)—Eu(1)—N(1) | 131.0(2)   | O(7)—Eu(1)—N(1) | 116.0(3)   |
| O(4)—Eu(1)—N(1) | 71.8(2)   | O(1)—Eu(1)—N(5) | 134.2(2)   | O(2)—Eu(1)—N(5) | 72.7(2)    |
| O(3)—Eu(1)—N(5) | 132.2(2)  | O(6)—Eu(1)—N(5) | 62.5(2)    | O(5)—Eu(1)—N(5) | 65.3(2)    |
| O(7)—Eu(1)—N(5) | 118.6(3)  | O(4)—Eu(1)—N(5) | 65.1(2)    | N(1)—Eu(1)—N(5) | 125.3(2)   |
| 3               |           |                 |            |                 |            |
| Eu(1)—O(1)      | 2.465(3)  | Eu(1)—O(2)      | 2.361(3)   | Eu(1)—O(3)      | 2.387(3)   |
| Eu(1)—O(4)      | 2.482(4)  | Eu(1)—O(6)      | 2.465(3)   | Eu(1)—O(7)      | 2.545(3)   |
| Eu(1)—O(9)      | 2.533(3)  | Eu(1)—O(10)     | 2.512(3)   | Eu(1)—O(12)     | 2.633(3)   |
| Eu(1)—N(1)      | 2.712(3)  |                 |            |                 |            |
| O(2)—Eu(1)—O(3) | 91.67(11) | O(2)—Eu(1)—O(6) | 123.28(12) | O(3)—Eu(1)—O(6) | 144.27(11) |

|                   |            |                  |            |                  |            |
|-------------------|------------|------------------|------------|------------------|------------|
| O(2)—Eu(1)—O(1)   | 73.75(10)  | O(3)—Eu(1)—O(1)  | 127.03(10) | O(6)—Eu(1)—O(1)  | 75.38(10)  |
| O(2)—Eu(1)—O(4)   | 75.79(11)  | O(3)—Eu(1)—O(4)  | 148.60(12) | O(6)—Eu(1)—O(4)  | 51.64(12)  |
| O(1)—Eu(1)—O(4)   | 77.52(11)  | O(2)—Eu(1)—O(10) | 133.38(9)  | O(3)—Eu(1)—O(10) | 82.76(11)  |
| O(6)—Eu(1)—O(10)  | 78.06(12)  | O(1)—Eu(1)—O(10) | 73.33(10)  | O(4)—Eu(1)—O(10) | 126.71(11) |
| O(2)—Eu(1)—O(9)   | 67.21(10)  | O(3)—Eu(1)—O(9)  | 70.91(12)  | O(6)—Eu(1)—O(9)  | 113.25(11) |
| O(1)—Eu(1)—O(9)   | 137.68(10) | O(4)—Eu(1)—O(9)  | 77.69(13)  | O(10)—Eu(1)—O(9) | 147.86(12) |
| O(2)—Eu(1)—O(7)   | 113.91(9)  | O(3)—Eu(1)—O(7)  | 84.96(10)  | O(6)—Eu(1)—O(7)  | 74.71(10)  |
| O(1)—Eu(1)—O(7)   | 147.72(9)  | O(4)—Eu(1)—O(7)  | 74.56(10)  | O(10)—Eu(1)—O(7) | 111.64(9)  |
| O(9)—Eu(1)—O(7)   | 49.45(8)   | O(2)—Eu(1)—O(12) | 167.52(10) | O(3)—Eu(1)—O(12) | 76.24(11)  |
| O(6)—Eu(1)—O(12)  | 68.39(12)  | O(1)—Eu(1)—O(12) | 115.96(9)  | O(4)—Eu(1)—O(12) | 113.08(11) |
| O(10)—Eu(1)—O(12) | 49.10(9)   | O(9)—Eu(1)—O(12) | 105.18(10) | O(7)—Eu(1)—O(12) | 62.62(9)   |
| O(2)—Eu(1)—N(1)   | 66.33(10)  | O(3)—Eu(1)—N(1)  | 64.20(10)  | O(6)—Eu(1)—N(1)  | 133.00(10) |
| O(1)—Eu(1)—N(1)   | 63.31(9)   | O(4)—Eu(1)—N(1)  | 131.10(10) | O(10)—Eu(1)—N(1) | 69.73(9)   |
| O(9)—Eu(1)—N(1)   | 112.25(10) | O(7)—Eu(1)—N(1)  | 148.97(10) | O(12)—Eu(1)—N(1) | 109.91(10) |

4

|                   |            |                  |            |                  |            |
|-------------------|------------|------------------|------------|------------------|------------|
| Tb(1)—O(1)        | 2.444(3)   | Tb(1)—O(2)       | 2.335(3)   | Tb(1)—O(3)       | 2.361(3)   |
| Tb(1)—O(4)        | 2.467(3)   | Tb(1)—O(5)       | 2.441(3)   | Tb(1)—O(7)       | 2.517(3)   |
| Tb(1)—O(8)        | 2.531(3)   | Tb(1)—O(10)      | 2.652(3)   | Tb(1)—O(11)      | 2.483(3)   |
| Tb(1)—N(1)        | 2.700(3)   |                  |            |                  |            |
| O(2)—Tb(1)—O(3)   | 92.14(10)  | O(2)—Tb(1)—O(5)  | 123.67(10) | O(3)—Tb(1)—O(5)  | 143.31(10) |
| O(2)—Tb(1)—O(1)   | 73.96(9)   | O(3)—Tb(1)—O(1)  | 128.02(9)  | O(5)—Tb(1)—O(1)  | 75.28(10)  |
| O(2)—Tb(1)—O(4)   | 75.57(11)  | O(3)—Tb(1)—O(4)  | 148.10(11) | O(5)—Tb(1)—O(4)  | 52.21(11)  |
| O(1)—Tb(1)—O(4)   | 77.35(10)  | O(2)—Tb(1)—O(11) | 133.44(9)  | O(3)—Tb(1)—O(11) | 83.02(10)  |
| O(5)—Tb(1)—O(11)  | 77.65(10)  | O(1)—Tb(1)—O(11) | 73.22(9)   | O(4)—Tb(1)—O(11) | 126.76(11) |
| O(2)—Tb(1)—O(7)   | 67.11(9)   | O(3)—Tb(1)—O(7)  | 70.72(11)  | O(5)—Tb(1)—O(7)  | 113.24(10) |
| O(1)—Tb(1)—O(7)   | 137.63(9)  | O(4)—Tb(1)—O(7)  | 77.39(12)  | O(11)—Tb(1)—O(7) | 148.12(11) |
| O(2)—Tb(1)—O(8)   | 114.45(9)  | O(3)—Tb(1)—O(8)  | 84.33(10)  | O(5)—Tb(1)—O(8)  | 74.20(9)   |
| O(1)—Tb(1)—O(8)   | 147.25(9)  | O(4)—Tb(1)—O(8)  | 74.74(10)  | O(11)—Tb(1)—O(8) | 111.09(9)  |
| O(7)—Tb(1)—O(8)   | 50.05(9)   | O(2)—Tb(1)—O(10) | 167.46(10) | O(3)—Tb(1)—O(10) | 75.74(10)  |
| O(5)—Tb(1)—O(10)  | 67.98(10)  | O(1)—Tb(1)—O(10) | 115.95(9)  | O(4)—Tb(1)—O(10) | 113.17(10) |
| O(11)—Tb(1)—O(10) | 49.29(9)   | O(7)—Tb(1)—O(10) | 105.11(9)  | O(8)—Tb(1)—O(10) | 61.90(9)   |
| O(2)—Tb(1)—N(1)   | 66.69(9)   | O(3)—Tb(1)—N(1)  | 64.73(10)  | O(5)—Tb(1)—N(1)  | 133.01(10) |
| O(1)—Tb(1)—N(1)   | 63.78(9)   | O(4)—Tb(1)—N(1)  | 131.33(10) | O(11)—Tb(1)—N(1) | 69.54(9)   |
| O(7)—Tb(1)—N(1)   | 112.41(10) | O(8)—Tb(1)—N(1)  | 148.95(10) | O(10)—Tb(1)—N(1) | 109.71(9)  |

**Table S2.** Hydrogen bonds in crystal packing (Å, °)

| Complexes | D-H...A           | d(D-H) | d(H...A) | d(D...A) | ∠DHA | Symmetry code |
|-----------|-------------------|--------|----------|----------|------|---------------|
| 1         | N(2)-H(2)...O(13) | 0.90   | 2.43     | 3.0481   | 126  | x,1+y,z       |
|           | N(3)-H(3)...O(14) | 0.90   | 2.11     | 2.8301   | 136  | 1-x,1-y,1-z   |
|           | N(4)-H(4)...Cl(1) | 0.90   | 2.82     | 3.6831   | 161  | 1-x,1-y,1-z   |
|           | N(6)-H(6)...O(10) | 0.90   | 2.19     | 2.9411   | 140  |               |
|           | N(7)-H(7)...Cl(6) | 0.90   | 2.75     | 3.6451   | 176  | 1-x,1-y,-z    |

|   |                      |      |      |        |      |                  |
|---|----------------------|------|------|--------|------|------------------|
|   | N(8)-H(8)...O(12)    | 0.90 | 2.54 | 3.1441 | 125  |                  |
|   | O(17)-H(62)...O(20)  | 0.87 | 2.06 | 2.653  | 124  |                  |
|   | O(17)-H(62)...O(21)  | 0.87 | 2.18 | 2.763  | 124  |                  |
|   | O(18)-H(64)...O(19)  | 0.87 | 2.13 | 2.692  | 123  | x,-1+y,z         |
|   | O(19)-H(65)...O(18)  | 0.87 | 2.13 | 2.692  | 122  | x,1+y,z          |
|   | C(7)-H(7B)...O(1)    | 0.97 | 2.34 | 2.7001 | 101  |                  |
|   | C(12)-H(12)...Cl(4)  | 0.93 | 2.71 | 3.572  | 154  | 1-x,1-y,-z       |
|   | C(20)-H(20)...N(3)   | 0.93 | 2.58 | 2.8971 | 100  |                  |
|   | C(25)-H(25)...O(14)  | 0.93 | 2.58 | 3.332  | 138  | -x,1-y,1-z       |
|   | C(31)-H(31B)...O(9)  | 0.97 | 2.51 | 3.4041 | 153  | 1-x,1-y,-z       |
|   | C(48)-H(48A)...O(6)  | 0.97 | 2.44 | 2.7831 | 100  |                  |
|   | C(51)-H(51)...Cl(2)  | 0.93 | 2.37 | 3.272  | 162  | 1-x,1-y,1-z      |
|   | C(55)-H(55B)...O(8)  | 0.96 | 2.50 | 3.432  | 163  | -1+x,y,z         |
|   | C(57)-H(57A)...O(19) | 0.96 | 2.50 | 3.162  | 126  |                  |
|   | C(58)-H(58)...O(13)  | 0.98 | 2.43 | 3.312  | 148  |                  |
|   | C(59)-H(59)...O(11)  | 0.98 | 2.38 | 3.212  | 142  |                  |
| 3 | N(2)-H(2A)...O(8)    | 0.86 | 2.17 | 3.0138 | 168  |                  |
|   | N(3)-H(3A)...O(12)   | 0.86 | 2.19 | 3.0370 | 169  |                  |
|   | C(8)-H(8)...N(2)     | 0.93 | 2.44 | 2.8020 | 103  |                  |
|   | C(8)-H(8)...O(7)     | 0.93 | 2.59 | 3.4066 | 147' |                  |
|   | C(11)-H(11B)...O(1)  | 0.97 | 2.47 | 2.8454 | 103  |                  |
|   | C(13)-H(13A)...O(7)  | 0.97 | 2.56 | 3.4237 | 149  |                  |
|   | C(13)-H(13B)...O(10) | 0.97 | 2.43 | 2.9359 | 112  |                  |
|   | C(13)-H(13B)...O(9)  | 0.97 | 2.40 | 3.0618 | 125  | x,1/2-y,1/2+z    |
|   | C(24)-H(24A)...O(2)  | 0.97 | 2.38 | 2.7976 | 105  |                  |
|   | C(24)-H(24B)...O(6)  | 0.97 | 2.55 | 3.5077 | 170  | x,1/2-y,-1/2+z   |
|   | C(26)-H(26B)...O(7)  | 0.97 | 2.60 | 3.5354 | 164  |                  |
|   | C(34)-H(34)...N(4)   | 0.93 | 2.44 | 2.7842 | 102  |                  |
|   | C(37)-H(37A)...O(3)  | 0.97 | 2.41 | 2.7987 | 103  |                  |
|   | C(39)-H(39B)...O(5)  | 0.97 | 2.58 | 3.5355 | 167  | 1-x,-1/2+y,1/2-z |
| 4 | N(2)-H(2)...O(10)    | 0.86 | 2.19 | 3.0374 | 169  |                  |
|   | N(3)-H(3)...O(9)     | 0.86 | 2.18 | 3.0235 | 167  |                  |
|   | C(1)-H(1A)...O(8)    | 0.97 | 2.57 | 3.4401 | 149  |                  |
|   | C(1)-H(1B)...O(11)   | 0.97 | 2.42 | 2.9134 | 111  |                  |
|   | C(1)-H(1B)...O(7)    | 0.97 | 2.40 | 3.0737 | 126  | x,1/2-y,1/2+z    |
|   | C(3)-H(3B)...O(1)    | 0.97 | 2.48 | 2.8553 | 103  |                  |
|   | C(5)-H(5)...N(3)     | 0.93 | 2.44 | 2.8045 | 104  |                  |
|   | C(14)-H(14B)...O(8)  | 0.97 | 2.60 | 3.5365 | 163  |                  |
|   | C(16)-H(16A)...O(2)  | 0.97 | 2.38 | 2.7970 | 105  |                  |
|   | C(16)-H(16B)...O(5)  | 0.97 | 2.54 | 3.4941 | 169  | x,1/2-y,-1/2+z   |
|   | C(27)-H(27B)...O(6)  | 0.97 | 2.60 | 3.5491 | 166  | 1-x,-1/2+y,1/2-z |
|   | C(29)-H(29A)...O(3)  | 0.97 | 2.41 | 2.8008 | 104  |                  |
|   | C(31)-H(31)...N(4)   | 0.93 | 2.49 | 2.8255 | 102  |                  |

**Table S3.** The details of the contributions of orbital transitions for some electronic transitions with large oscillator strengths for L<sup>I</sup> and L<sup>II</sup> ligands from the TD-DFT calculation.

| The TD-DFT calculation of the L <sup>I</sup> .  |   |               |                       |                     |
|-------------------------------------------------|---|---------------|-----------------------|---------------------|
| Excited State                                   |   | Percentage(%) | Excitation energy(nm) | Oscillator strength |
| 119->123                                        |   | 28.99         | 211.54                | 0.0348              |
| 120->123                                        |   | 62.33         |                       |                     |
| 120->128                                        |   | 3.62          |                       |                     |
| 120->129                                        |   | 2.57          |                       |                     |
| 120->130                                        |   | 2.49          |                       |                     |
| Excited State                                   | 2 | Percentage(%) | Excitation energy(nm) | Oscillator strength |
| 114 ->126                                       |   | 2.67          | 210.92                | 0.0375              |
| 114 ->127                                       |   | 5.04          |                       |                     |
| 119 ->123                                       |   | 4.83          |                       |                     |
| 121 ->124                                       |   | 28.84         |                       |                     |
| 121 ->125                                       |   | 4.07          |                       |                     |
| 121 ->126                                       |   | 19.41         |                       |                     |
| 121 ->127                                       |   | 21.90         |                       |                     |
| 121 ->128                                       |   | 10.31         |                       |                     |
| 122 ->131                                       |   | 2.86          |                       |                     |
| The TD-DFT calculation of the L <sup>II</sup> . |   |               |                       |                     |
| Excited State                                   |   | Percentage(%) | Excitation energy(nm) | Oscillator strength |
| 159 ->163                                       | 1 | 18.34         | 284.85                | 0.1007              |
| 161 ->163                                       |   | 81.66         |                       |                     |
| Excited State                                   | 2 | Percentage(%) | Excitation energy(nm) | Oscillator strength |
| 154 ->165                                       |   | 2.60          | 276.22                | 0.1861              |
| 158 ->162                                       |   | 65.61         |                       |                     |
| 160 ->164                                       |   | 31.78         |                       |                     |

### Intrinsic quantum yield ( $\Phi_{Ln}$ ).

Following the method described in literature,<sup>2</sup> it is possible to estimate the intrinsic quantum yield ( $\Phi_{Ln}$ ) of the Eu(III) complexes 1 and 3 on the basis of the luminescence data (emission spectrum and <sup>5</sup>D<sub>0</sub> lifetimes). Assuming that only nonradiative ( $k_{nr}$ ) and radiative ( $k_r$ , estimated according to the reported method) processes are involved in the depopulation of the <sup>5</sup>D<sub>0</sub> state, ( $\Phi_{Ln}$ ) may be expressed as:

$$\Phi_{Ln} = \frac{k_r}{k_r + k_{nr}}$$

The lifetime ( $\tau$ ), radiative ( $k_r$ ), and non-radiative ( $k_{nr}$ ) transition rates are related through the following equation:

$$\frac{1}{\tau} = k_r + k_{nr}$$

The overall luminescence quantum yields  $\Phi_{\text{overall}}$  for Eu(III) complex was determined by an absolute method using an integrating sphere, which can be calculated as follows:

$$\Phi_{\text{overall}} = \Phi_{\text{Ln}} \times \Phi_{\text{transfer}}$$

In this expression,  $\Phi_{\text{transfer}}$  is the sensitization efficiency defined as the efficacy with which energy is transferred from the feeding levels of the ligands onto the Ln(III) excited states.

The intrinsic quantum yield ( $\Phi_{\text{Ln}}$ ), radiative ( $k_r$ ), nonradiative ( $k_{nr}$ ) decay rates, and the sensitization efficiency of the ligand ( $\Phi_{\text{transfer}}$ ) are shown in Table S4.

**Table S4.** Photoluminescence data of the  $[\text{EuL}^{\text{I}}_2(\text{C}_3\text{H}_6\text{O})] \cdot (\text{NO}_3)_3 \cdot (\text{HCCl}_3) \cdot (\text{H}_2\text{O})_4$  (**1**) and  $\text{EuL}^{\text{II}}(\text{NO}_3)_3$  (**3**).

| compounds | $\langle\tau\rangle$ (ms) | $k_r$ ( $\text{ms}^{-1}$ ) | $k_{nr}$ ( $\text{ms}^{-1}$ ) | $\Phi_{\text{Ln}}(\%)$ | $\Phi_{\text{trans}}(\%)$ |
|-----------|---------------------------|----------------------------|-------------------------------|------------------------|---------------------------|
| 1         | 0.962                     | 0.386                      | 0.653                         | 37.14                  | 16.18                     |
| 3         | 1.1376                    | 0.526                      | 0.353                         | 59.86                  | 22.27                     |

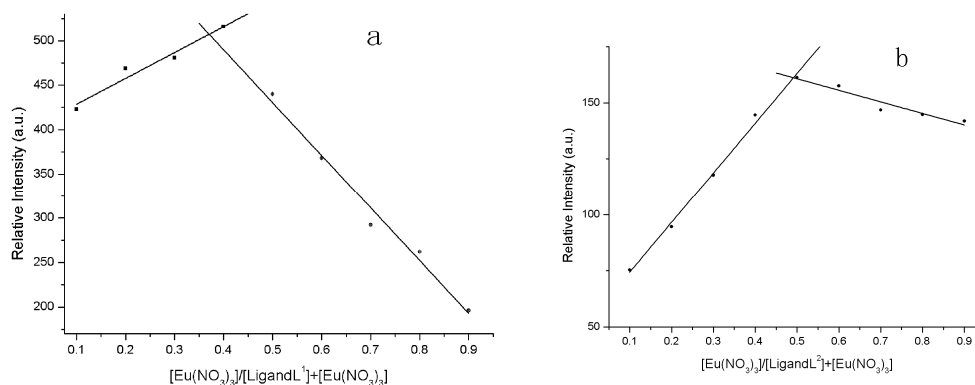

**Fig. S1** Job's plots showing the 1:2 binding of  $\text{L}^{\text{I}}$  ( $1.0 \times 10^{-3} \text{ molL}^{-1}$  in ethyl acetate) to  $\text{Eu}(\text{NO}_3)_3$  ( $1.0 \times 10^{-3} \text{ molL}^{-1}$  in ethyl acetate) (a), 1:1 binding of  $\text{L}^{\text{II}}$  ( $1.0 \times 10^{-3} \text{ molL}^{-1}$  in acetone) to  $\text{Eu}(\text{NO}_3)_3$  ( $1.0 \times 10^{-3} \text{ molL}^{-1}$  in acetone) (b), where the difference in fluorescence intensity at 615 nm was plotted against the mole fraction of 1 at an invariant total concentration.

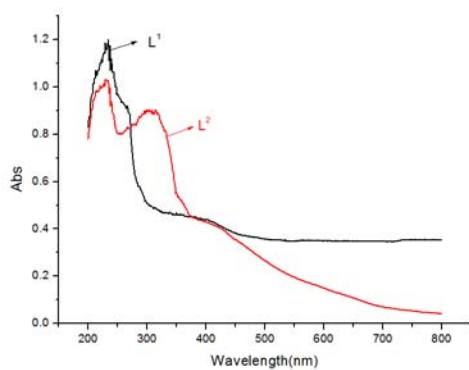

**Fig. S2** The UV-vis absorbance spectra of the ligands L<sup>I</sup> and L<sup>II</sup> in the solid state.

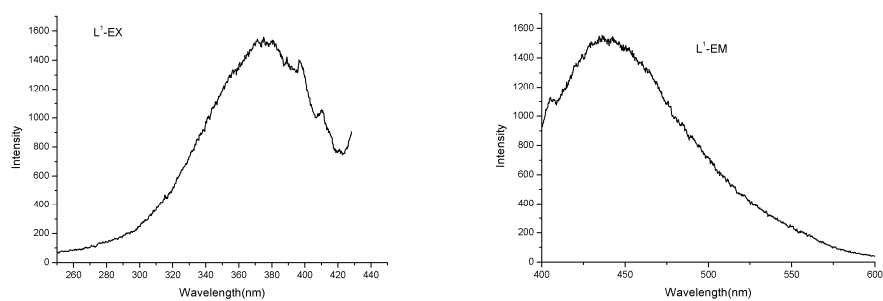

**Fig. S3** Room-temperature excitation and emission spectra of L<sup>I</sup> in the solid state.

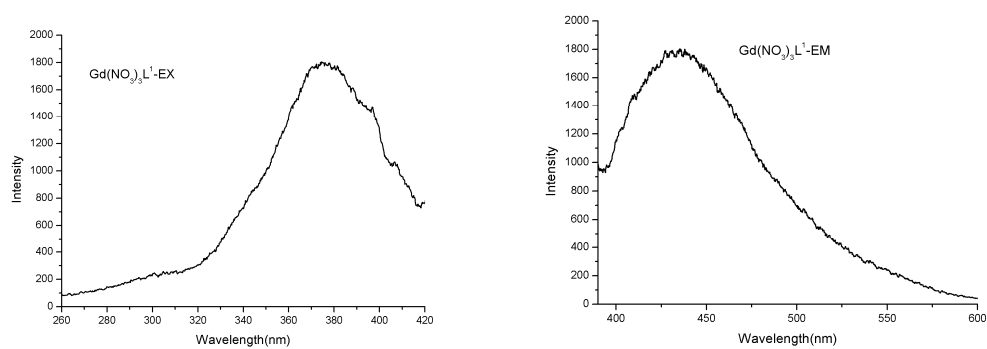

**Fig. S4** Room-temperature excitation and emission spectra of Gd(NO<sub>3</sub>)<sub>3</sub>L<sup>I</sup> in the solid state.

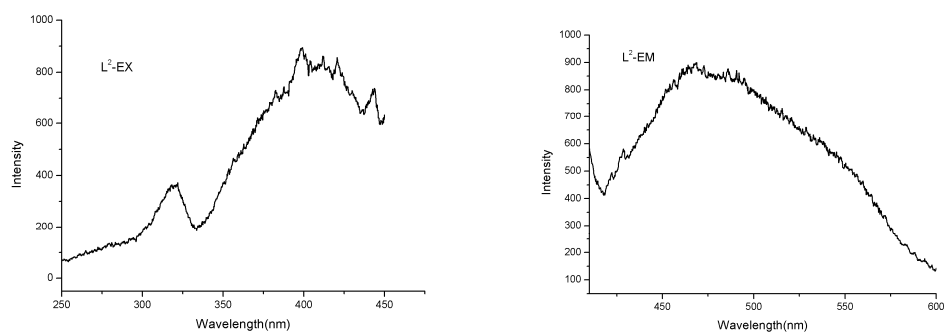

**Fig. S5** Room-temperature excitation and emission spectra of  $L^{II}$  in the solid state.

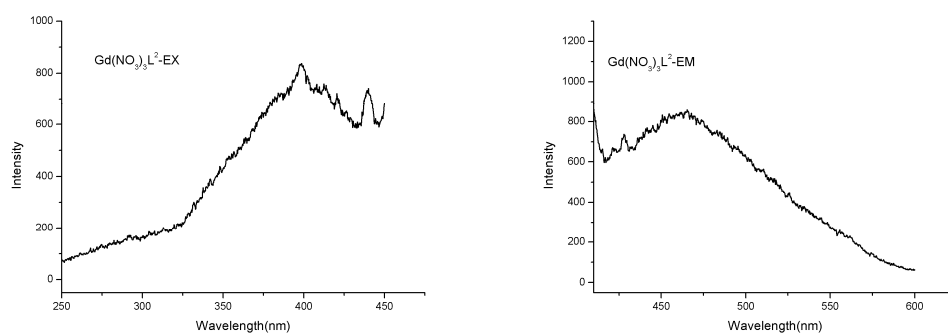

**Fig. S6** Room-temperature excitation and emission spectra of  $Gd(NO_3)_3L^{II}$  in the solid state.

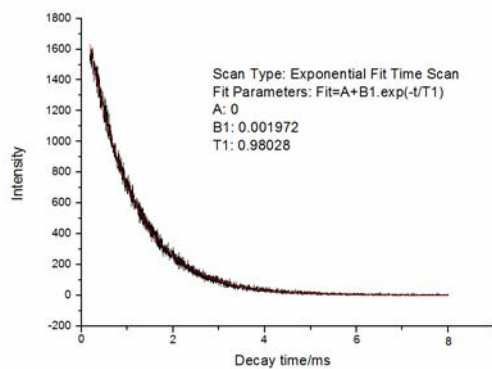

**Fig. S7** Luminescence decay curve of the compound **1**.



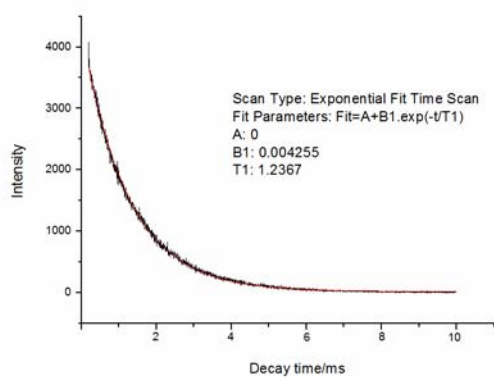

**Fig. S8** Luminescence decay curve of the compound 2.

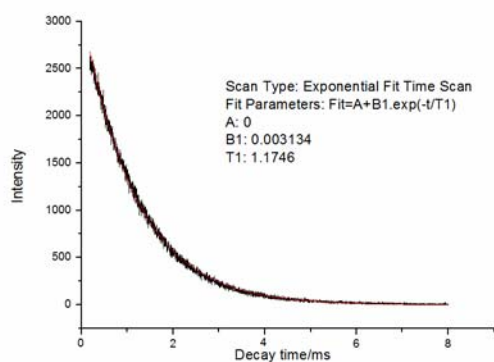

**Fig. S9** Luminescence decay curve of the compound 3.

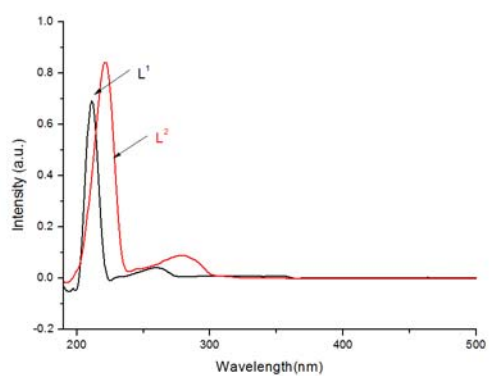

**Fig. S10** The UV-vis absorbance spectrum of the ligands L<sup>I</sup> and L<sup>II</sup> in methanol.

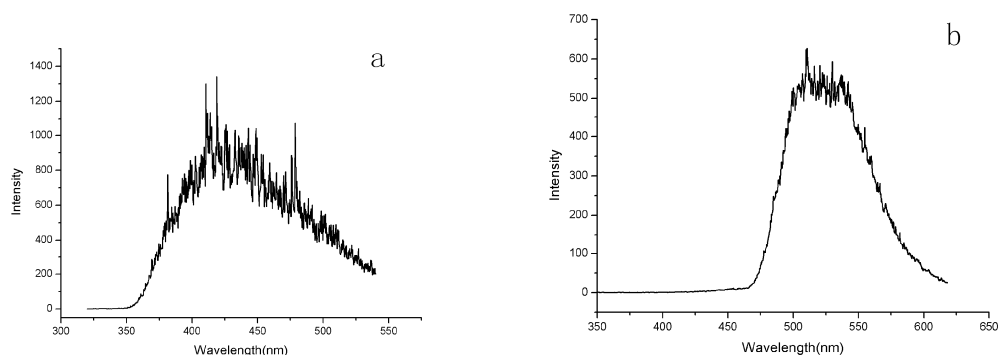

**Fig. S11** Phosphorescence spectra of the Gd complexes for the ligands L<sup>I</sup> (a) and L<sup>II</sup> (b) at 77K.

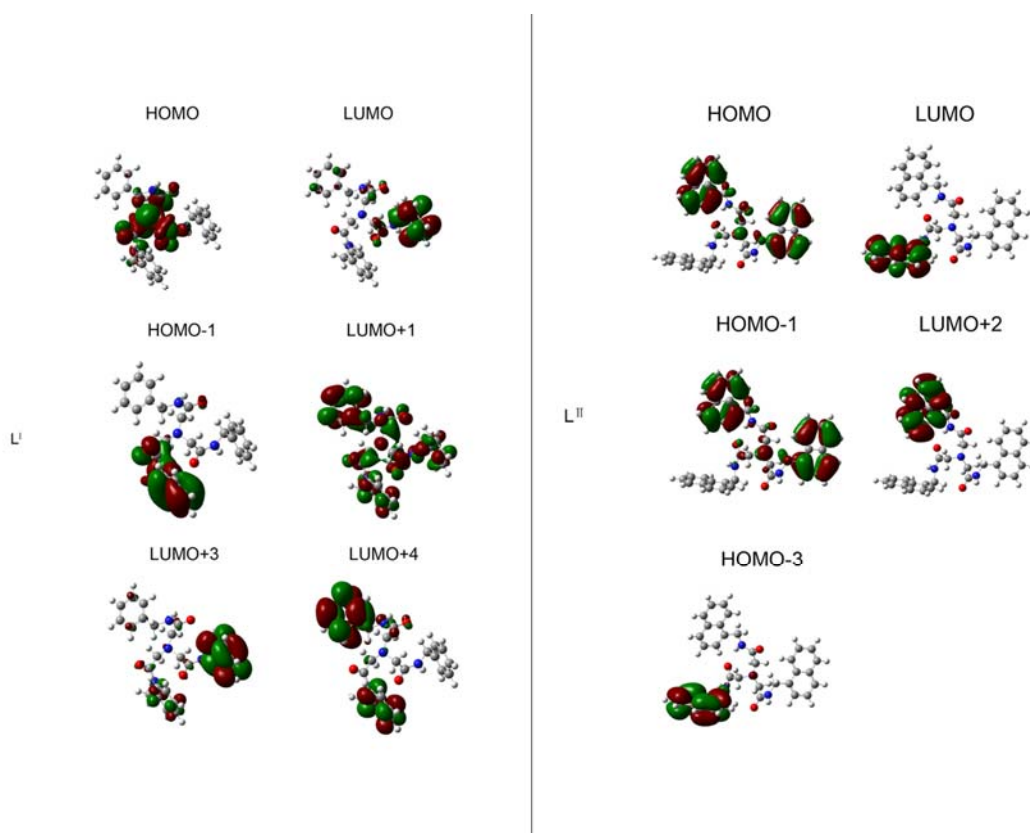

**Fig. S12** Frontier molecular orbitals including HOMO and LUMO of the ligands L<sup>I</sup> and L<sup>II</sup>.

## References

1. (a) K. Z. Tang, Y. F. Li, Y. Tang, W. S. Liu, N. Tang and M. Y. Tan, *Spectrochim. Acta A*, 2007, **67**, 858-863; (b) Y. Tang, K. Z. Tang, H. Zhang, C. Y. Su, W. S. Liu and M. Y. Tan, *Inorg. Chem. Commun.*, 2005, **8**, 1018-1021.
2. (a) Y. Su, L. Li and G. Li, *Chem Mater*, 2008, **20**, 6060-6067; (b) Y. Ma, H. Wang, W. Liu, Q. Wang, J. Xu and Y. Tang, *The Journal of Physical Chemistry B*, 2009, **113**, 14139-14145; (c) M. Fernandes, V. de Zea Bermudez, R. A. Sá Ferreira, L. D. Carlos, A. Charas, J. Morgado, M. M. Silva and M. J. Smith, *Chem Mater*, 2007, **19**, 3892-3901.
